# Supplementary material
Source: publisher figshare collection journal article supplement (https://tandf.figshare.com/ndownloader/files/21445554)
Supplement: Supplementary file 1 [file 21445554]

## Sheet: lncRNA overlapping promoters
Systematic Name	Standard Name	lncRNA type overlapping promoters
		CUT	SUT	MUT	XUT
YBR070C	ALG14				XUT0974
YBR023C	CHS3				XUT0969
YCR017C	CWH43	CUT465
YKL046C	DCW1	CUT717
YAL063C	FLO9		SUT433	MUT12
YOL030W	GAS5	CUT366
YJL002C	OST1		SUT686
YKL164C	PIR1/CCW6			MUT892
YJL159W	PIR2/HSP150/CCW7			MUT847
YKL163W	PIR3/CCW8		SUT228
YGR199W	PMT6	CUT161
YDL055C	PSA1/SRB1/VIG9	CUT488
YDR055W	PST1	CUT066			XUT0174
YNL066W	SCW3/SUN4	CUT337, CUT338	SUT2873
YGL225W	VRG4/VIG4		SUT111

## Sheet: antisense lncRNA
Systematic Name	Standard Name	Antisense lncRNAs
		CUT	SUT	MUT	XUT
YNR044W	AGA1		SUT755
YEL058W	AGM1/PCM1			MUT423
YGR227W	ALG10/DIE2		SUT1527
YBR070C	ALG14	CUT022
YBL082C	ALG3			MUT114
YHR101C	BIG1				XUT0451
YNL233W	BNI4		SUT2308
YDR182W	CDC1			MUT277
YNL192W	CHS1		SUT2316
YBR038W	CHS2			MUT70
YLR330W	CHS5	CUT747	SUT706
YHR142W	CHS7		SUT588		XUT1308
YLR213C	CRR1		SUT272
YKL096W	CWP1				XUT1432
YDL117W	CYK3				XUT1042
YJR150C	DAN1/CCW13		SUT1867,SUT1869		XUT0554
YJR151C	DAN4		SUT1870		XUT0555
YGR092W	DBF2			MUT596
YIL049W	DFG10			MUT766	XUT1347
YMR238W	DFG5		SUT2205
YPR183W	DPM1	CUT923
YHR143W	DSE2		SUT589		XUT1308
YNR067C	ENG1/DSE4				XUT0781, XUT0782
YLR300W	EXG1/BGL1				XUT1506
YDR261C	EXG2				XUT0203
YLR342W	FKS1/GSC1/CWH53		SUT2043
YMR306W	FKS3	CUT792
YAR050W	FLO1		SUT861		XUT0947, XUT0948, XUT0949
YIR019C	FLO11/MUC1		SUT194
YHR211W	FLO5		SUT600, SUT1668
YAL063C	FLO9		SUT866		XUT0002, XUT0003
YLR343W	GAS2				XUT1511
YOL132W	GAS4		SUT2398		XUT1668
YOL030W	GAS5		SUT2417
YFL017C	GNA1				XUT0314
YOR320C	GNT1	CUT392
YGR216C	GPI1		SUT1629
YMR281W	GPI12		SUT2210		XUT1595
YLL031C	GPI13			MUT1020
YJR013W	GPI14	CUT692			XUT1385
YPL076W	GPI2	CUT897
YJL062W	GPI7/LAS21	CUT688	SUT631		XUT1369
YDR331W	GPI8		SUT174		XUT1095
YDR221W	GTB1		SUT474		XUT1085
YJL091C	GWT1		SUT208
YHR204W	HTM1/MNL1		SUT597		XUT1319
YDL049C	KNH1		SUT1240		XUT0152
YOR336W	KRE5	CUT869, CUT870
YKR061W	KTR2	CUT725
YKL165C	MCD4		SUT1940, SUT1941
YKL201C	MNN4		SUT221		XUT0567
YPL053C	MNN6/KTR6			MUT1539
YJR131W	MNS1				XUT1406
YGL257C	MNT2				XUT0325
YOR085W	OST3			MUT1328
YML019W	OST6				XUT1546
YCR044C	PER1		SUT036
YOL003C	PFA4		SUT2509		XUT0810
YNL158W	PGA1				XUT1618
YKL164C	PIR1/CCW6		SUT227
YKL163W	PIR3/CCW8		SUT660, SUT1886
YDL093W	PMT5			MUT242
YGR199W	PMT6		SUT1526		XUT1268
YPL096W	PNG1			MUT1478
YDL055C	PSA1/SRB1/VIG9		SUT1239
YDR055W	PST1		SUT1131
YBR005W	RCR1				XUT0963
YBR002C	RER2		SUT009
YJR004C	SAG1		SUT1857
YGL028C	SCW11		SUT1580
YNL066W	SCW3/SUN4		SUT2330		XUT1630
YGR279C	SCW4		SUT144
YDR077W	SED1		SUT1135
YGR143W	SKN1		SUT562		XUT1260
YER150W	SPI1				XUT1155
YDR522C	SPS2	CUT100	SUT081		XUT0249
YCL048W	SPS22		SUT1024
YOR247W	SRL1		SUT2453
YOR190W	SSG1/SPR1		SUT785		XUT1707
YBR067C	TIP1		SUT016		XUT0050
YOR010C	TIR2		SUT2515		XUT0812
YIL011W	TIR3		SUT613		XUT1347
YEL004W	YEA4				XUT1128
YER005W	YND1		SUT507		XUT1131
SUT2104	YPS1		SUT2104
YDR144C	YPS2/MKC7				XUT0191
YIR039C	YPS6		SUT616
YJL139C	YUR1			MUT849	XUT0522
